# Supplementary material for: Spike mutation pipeline reveals the emergence of a more transmissible form of SARS-CoV-2
Source: bioRxiv or medRxiv preprint supplement (doi:10.1101/2020.04.29.069054), 2020-05-05
Supplement: Supplementary file [file media-1.pdf]

## Supplemental Information

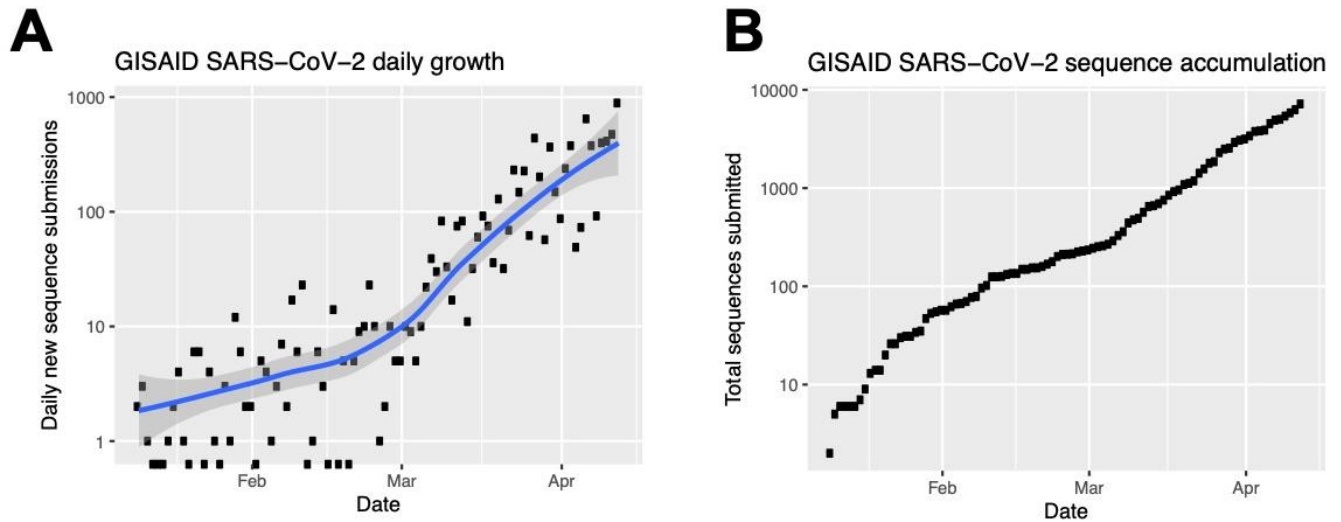

**Fig. S1. The submission of new SARS CoV-2 sequences to the global initiative on sharing avian flu data (GISAID) each day.** The number of sequences submitted each day to GISAID is increasing at a rapid pace, and the cumulative number of sequences has reached nearly 10,000 sequences in the 4 months since the epidemic began. We end here at April 13, the point at which we did the bulk of the analysis in this paper, but our goal is a daily update of the figures such as the trees that track accruing Spike mutations shown in Fig. 1.

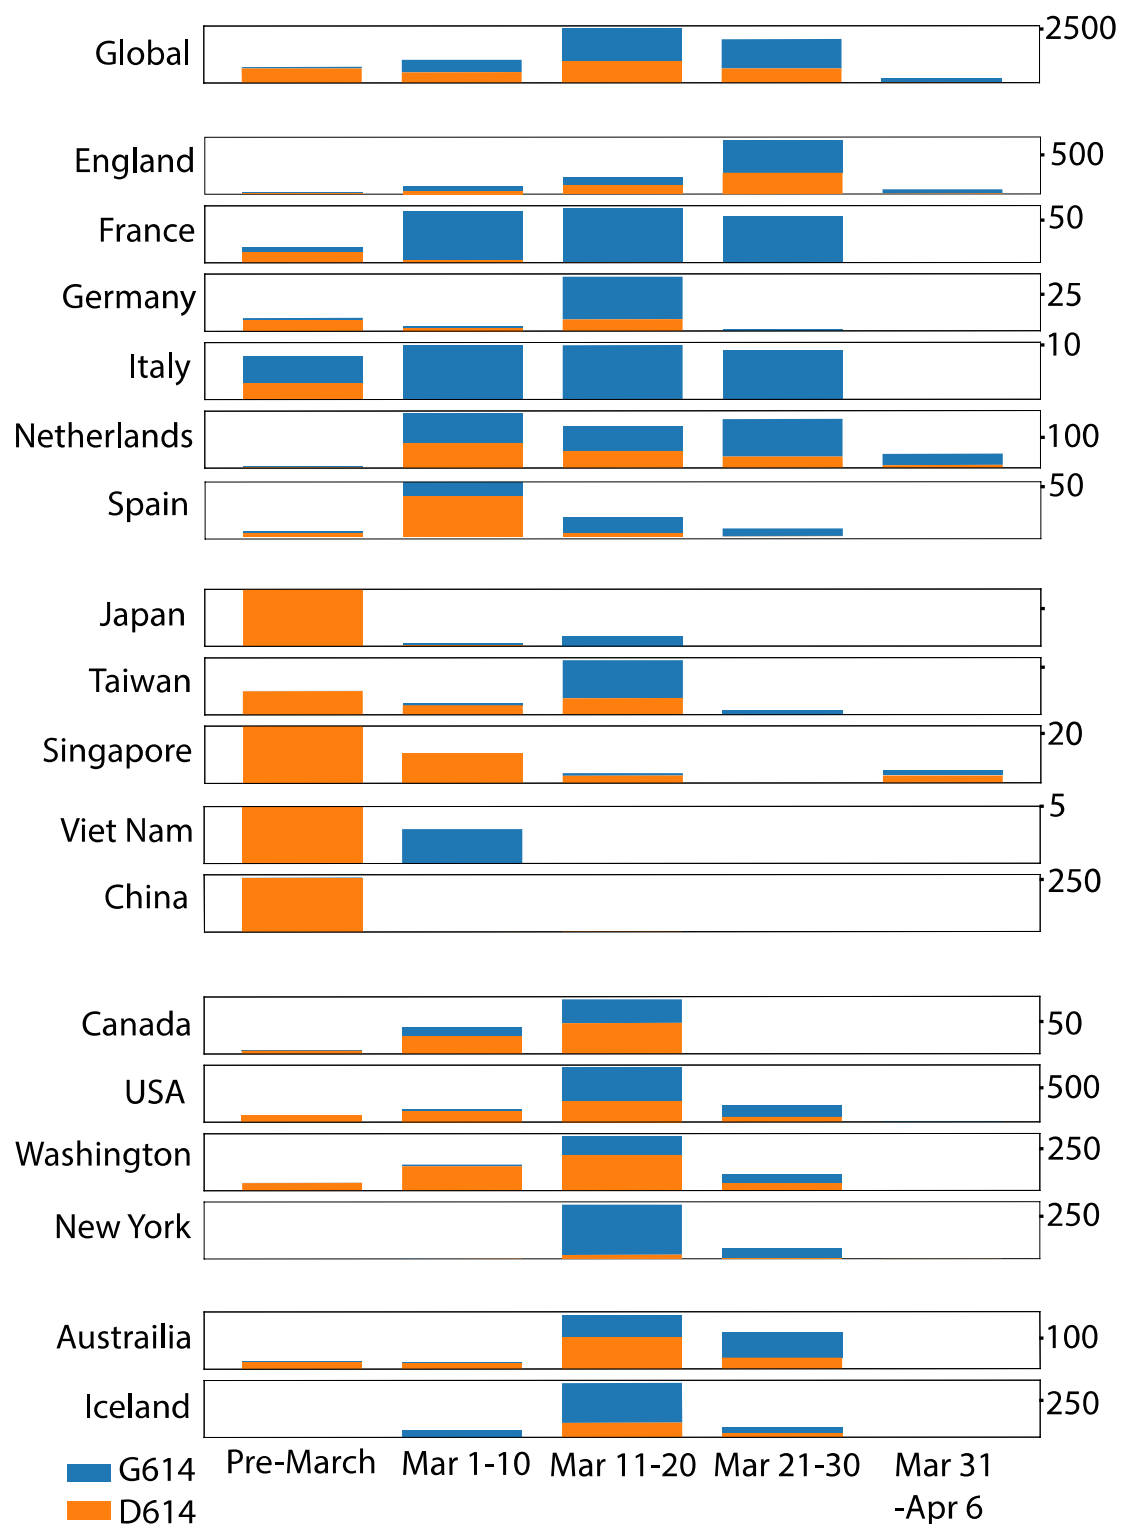

**Fig. S2. The increasing frequency of the D614G mutation over time, in different regions of the world.** The figure complements Fig. 2B in the main text, but here the height of the bars indicates the tally of the number of sequences of each form, rather than the frequency as in Fig. 2B.

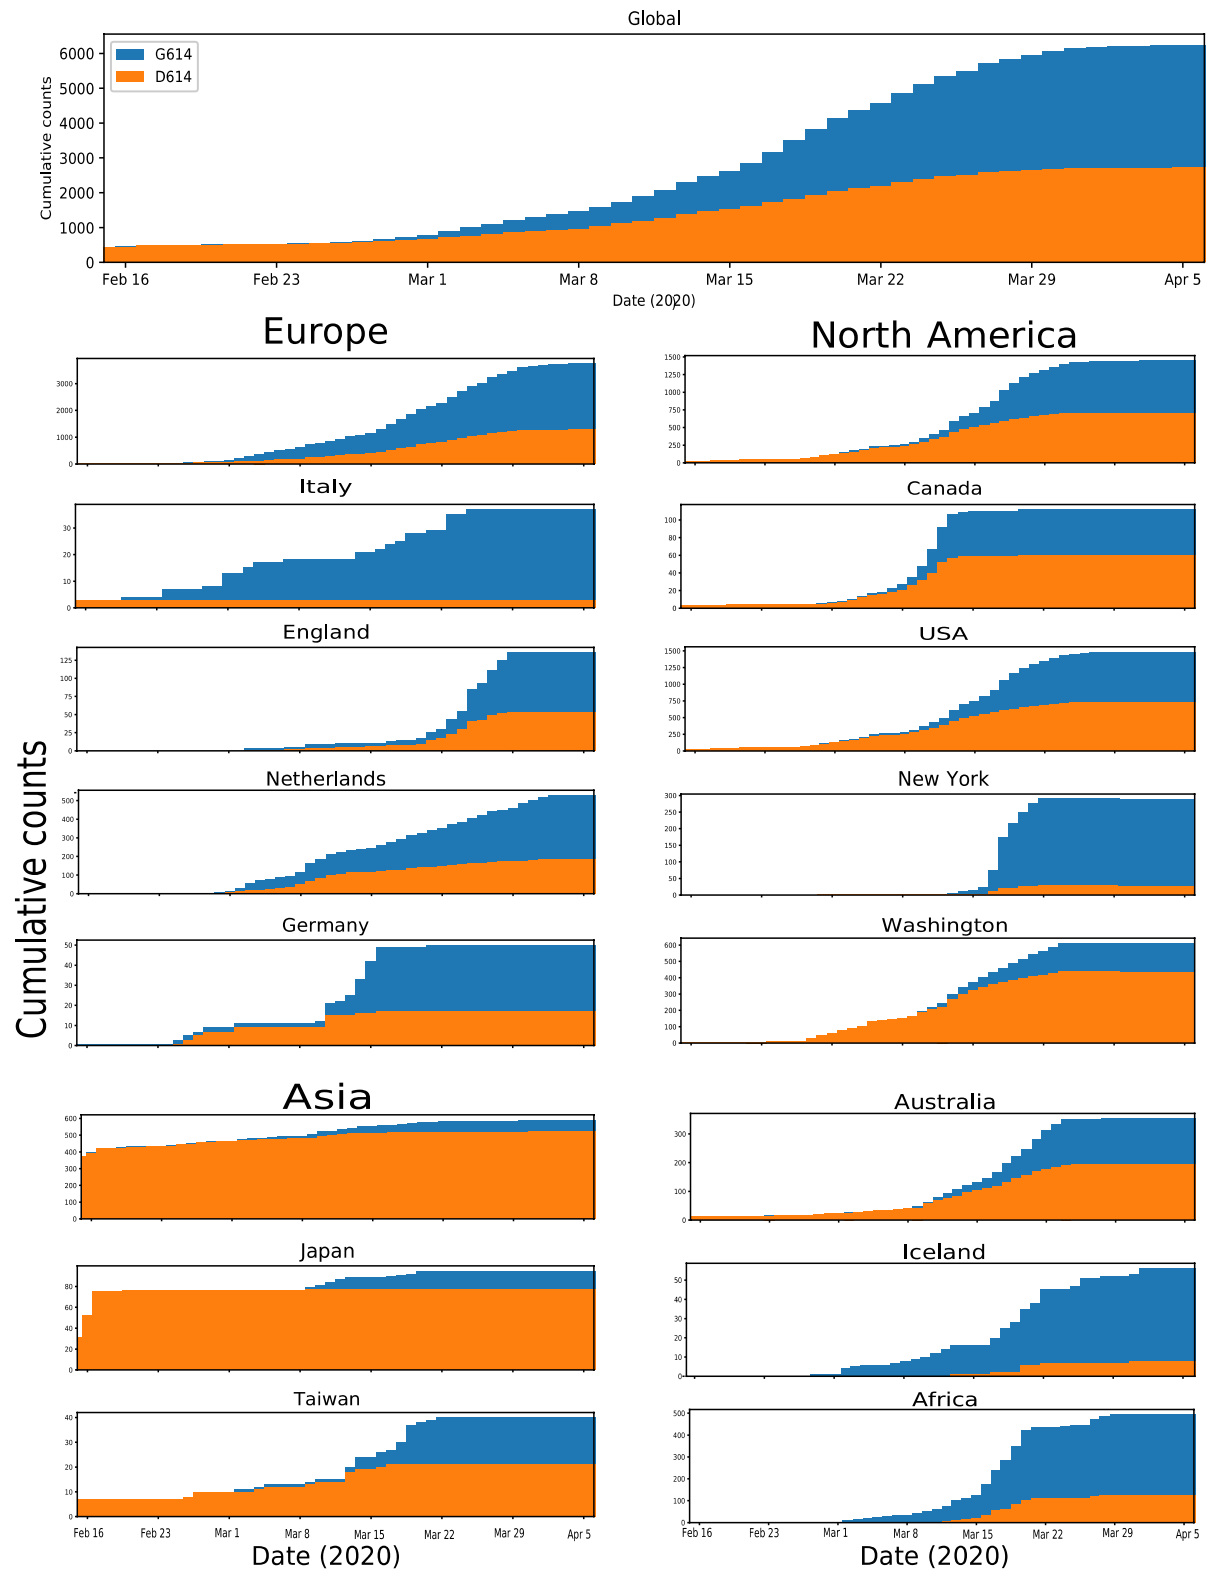

**Fig. S3.** Daily cumulative plots showing the relative amount of D614 (orange) and G614, (blue) in different regions of the world. These plots present the same data as in Fig. 3 in a

different view, shown as cumulative daily tallies rather than the running weekly averages shown in Fig. 3

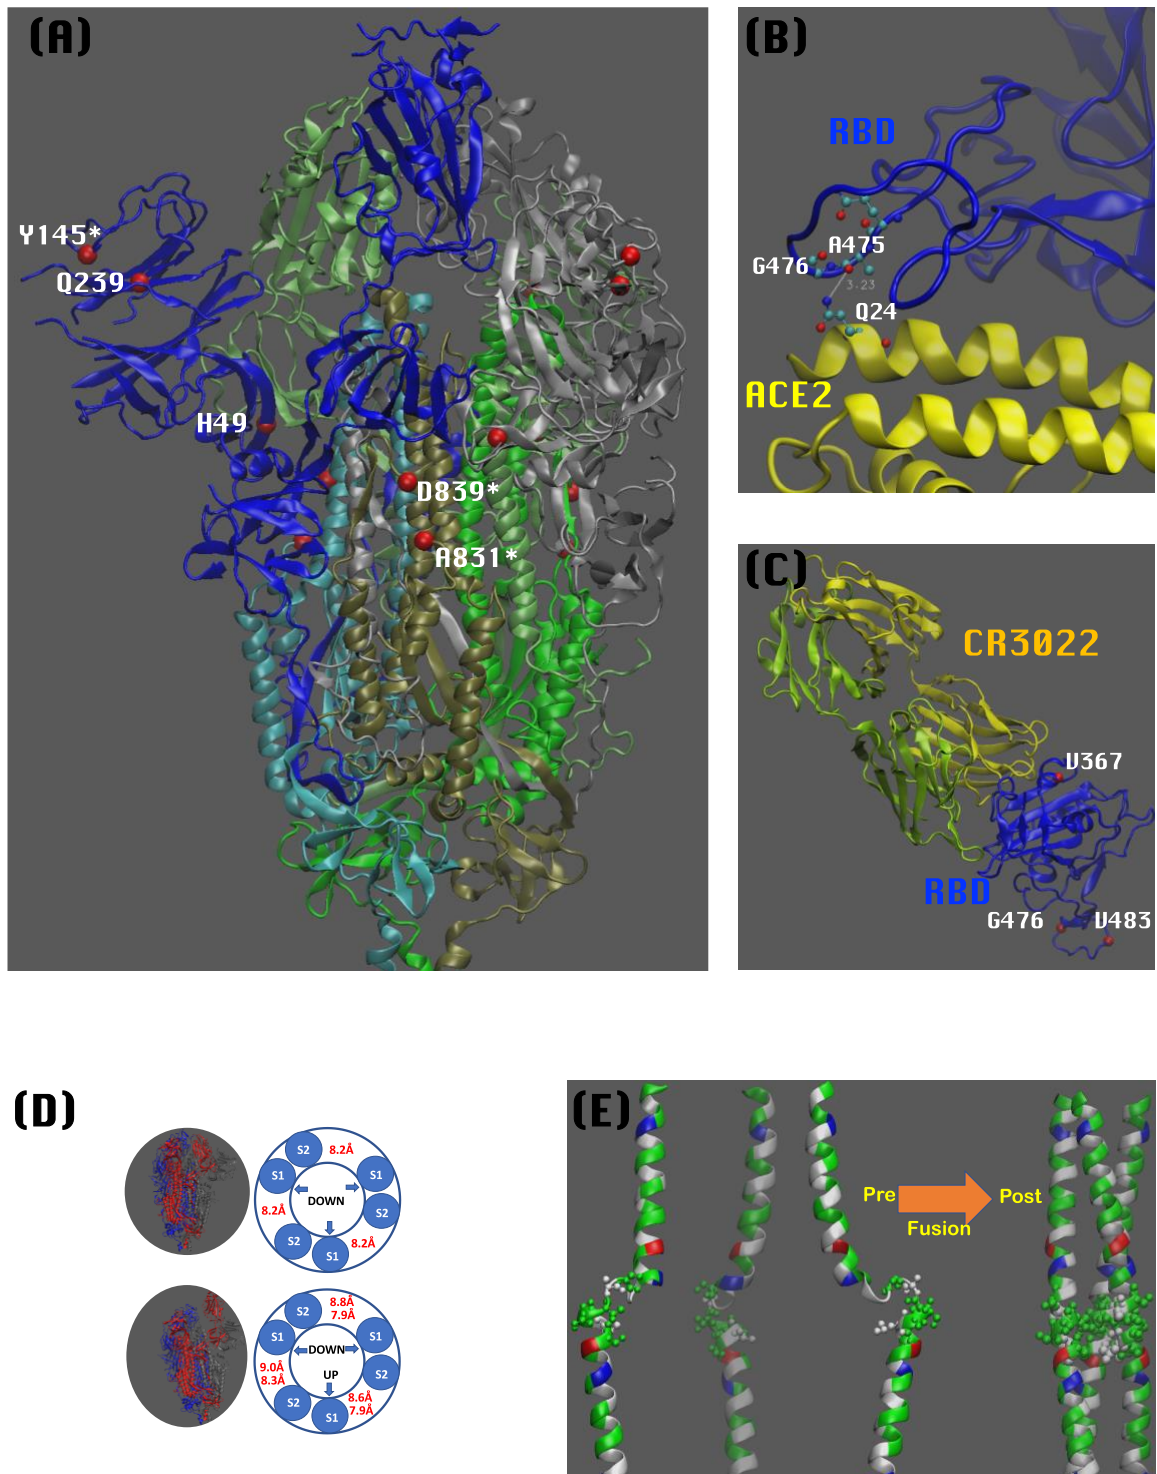

**Fig. S4. Additional structural mapping relating to sites of interest in the Spike protein.**

**A)** Structural mapping of additional mutational sites in the Spike protein. (PDB:6VSB). Different

colors are used to distinguish the protomers and S1 and S2 units (protomer #1: S1-blue, S2-cyan; protomer #2: S1-grey, S2-tan; protomer #3: S1-light green, S2-dark green). The RBD of protomer #1 is in “UP” position for engagement with ACE2 receptor. Red balls are used to indicate individual mutational sites. When a mutational site is missing in the structure, the closest residue to the mutational site is mapped and is indicated by a \* next to the amino acid label. **B)** The RBD-ACE2 binding interface (PDB: 6M17) near the mutational site G476S. Q24 in ACE2 is the closest residue to this mutational site. However, the neighbor residue, A475, is even closer to the ACE2 with a potential to form hydrogen bonding. **C)** The three mutational sites in RBD in the context of recognition by the antibody CR3022 (PDB: 6W41). The heavy and light chains are colored in yellow and green, respectively. **D)** Structure based studies imply that the RBD needs to be in the “UP” position to engage with ACE2 receptor. We evaluate whether the protomer-protomer contacts between D416 and T859 could be impacted by the “UP” or “DOWN” conformations. Here we show the protomer-protomer distance (red) defined by the CA atoms of these residues in a cartoon diagram representing all-DOWN and one-UP configurations of RBD in a Spike trimer. In the all-DOWN conformation (PDB: 6VXX), the inter-protomer distance between D614 and T859 does not change within the trimer. In the one-UP conformation, inter-protomer distances slightly vary within a trimer. In the case of one-UP conformation, two distances are provided. The top (PDB: 6VSB) and bottom (PDB: 6VYB) numbers are extracted from different cryo-EM structures. **E)** The left and right images show the amphipathicity of pre-fusion (PDB:6VSB) and post-fusion (PDB: 6LXT) helices of HR1 region (Charged/Polar: red/blue/green and hydrophobic: white). Ser/Thr rich region spanning S937-S943 (ball and sticks) may play a role in elongation and association of these amphipathic helices. This figure accompanies Fig. 4 in the main text.

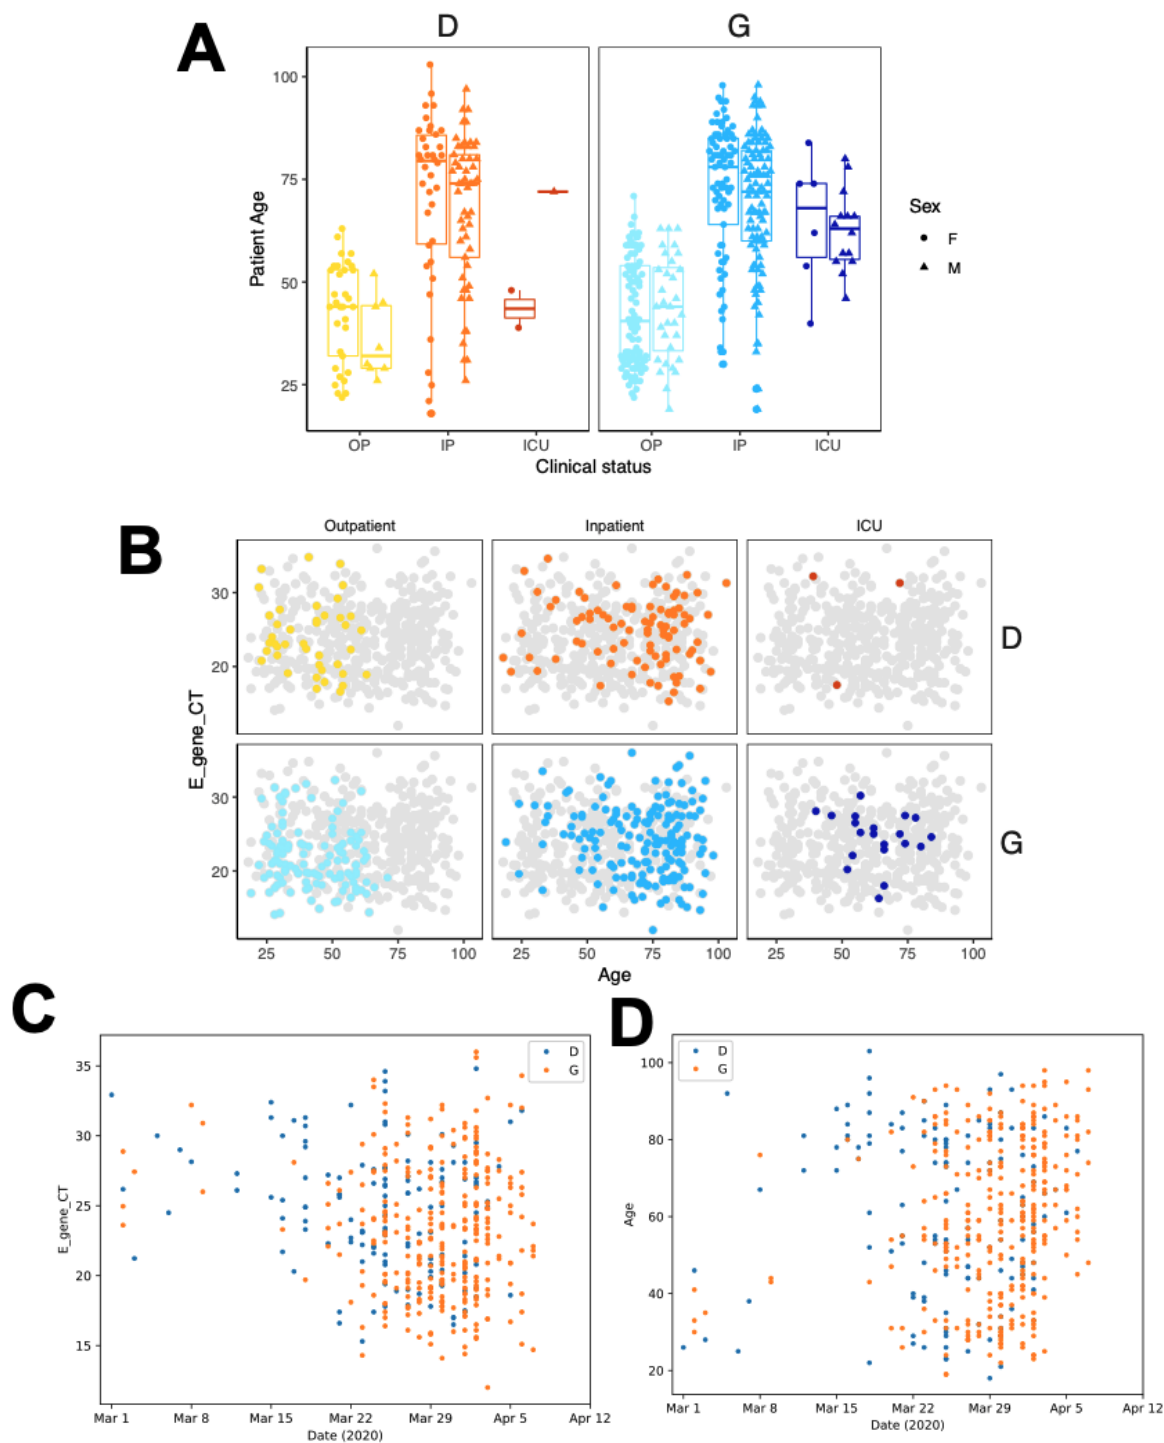

**Fig. S5. Distribution of clinical status with respect to patient age, sex, and a proxy for viral load when sampled. A)** Patient age and sex by clinical status and D614G status. OP = outpatient, IP = inpatient, ICU = intensive care unit. **B)** Cycle threshold for product detection in PCR of the E gene: lower values correspond to greater quantities of viral RNA. In each panel, colored points denote data from that panel; grey points, representing the total data set, are

identical for all 6 panels. Colors correspond to those in the main manuscript (greater intensity reflecting more severe disease as indicated by OP, IP or ICU care decisions. The relative distribution over sampling time of D614 and G614 among values for **C**) PCR CT, and **D**) Age. The relative distribution of D614 and G614 appears to be reasonable consistent though time, indicating that there was not an overt bias introduced due to G614 tending to be sampled later and D614 sampled earlier. Of note, the earliest samples have high E gene CT values, indicative of lower viral loads, and the patient population tends to be younger.

# Mismatches compared to the Wuhan Reference Strain, Belgium, Full Genome Alignment

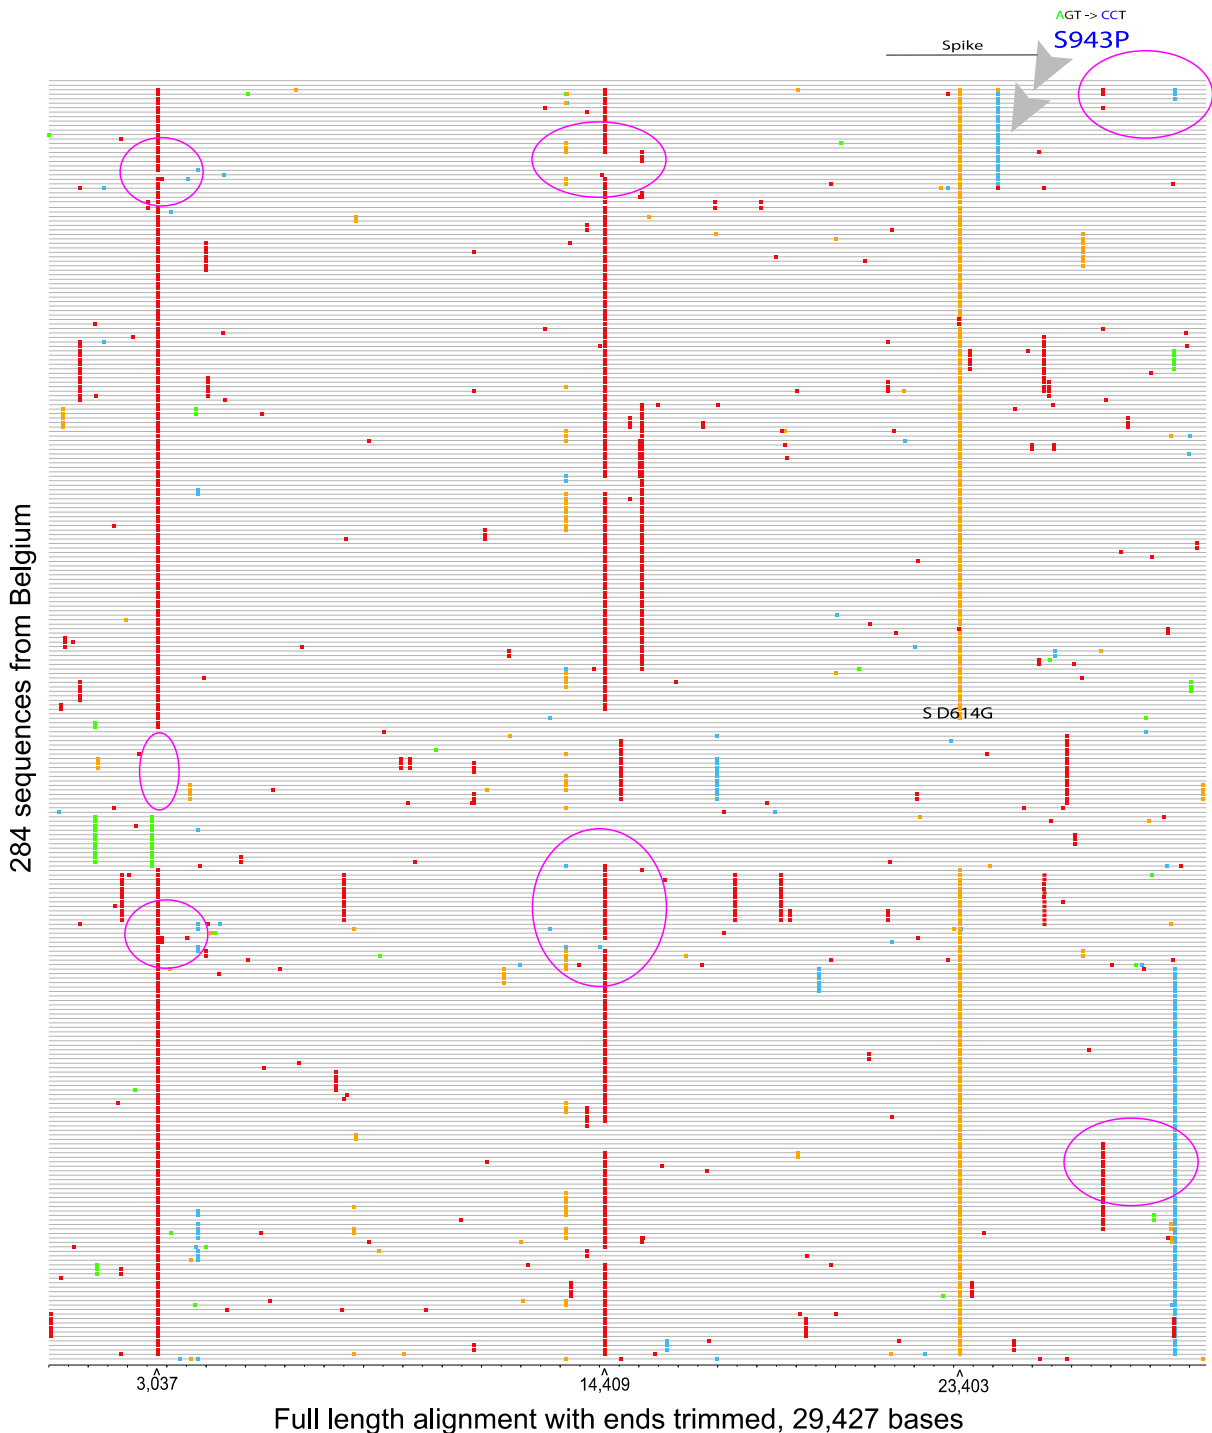

**Fig. S6. Highlighter plot of the DNA alignment of all of the full length genomes from Belgium relative to the Wuhan reference strain.** Changes to different bases are marked by different colors, and the G->A (A is orange) change indicative of the D614G codon mutation is indicated. The double mutation to C (C is blue) in the S943P mutation are gathered at the top of the alignment and highlighted by the grey arrow. Magenta circles highlight regions of the



genome where a characteristic pattern of mutation is associated with both sequences that have the S943P mutation, and with sequences that do not. Phylogenetically informative sites were extracted from this full-length alignment to create a shorter, easier to visualize alignment when create Fig. 6.

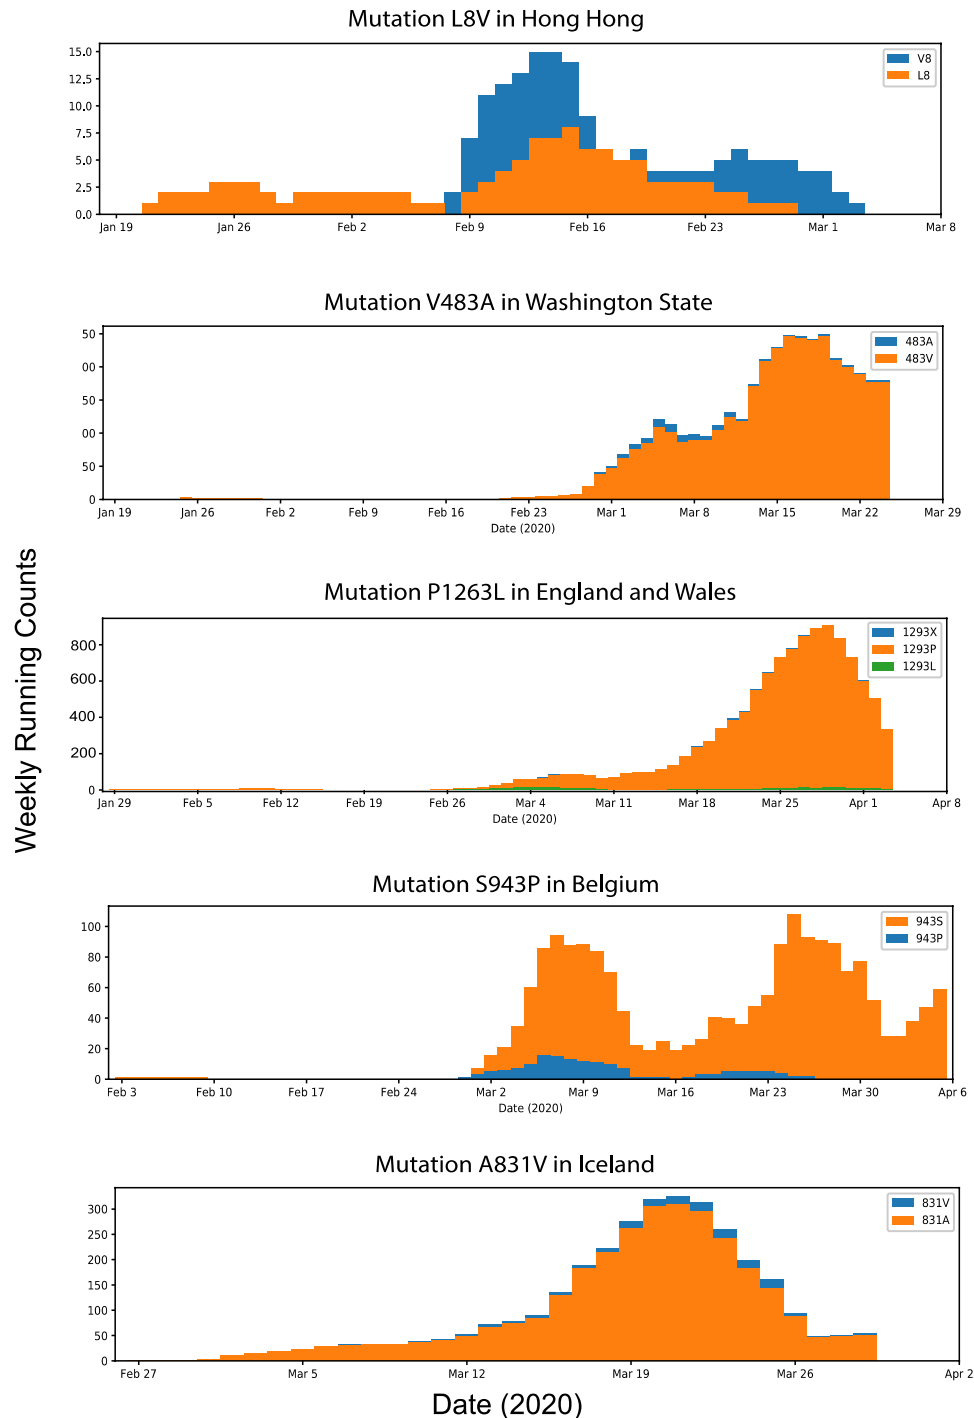

**Fig. S7. Weekly running counts of mutations in sites of interest in local epidemics where a particular mutation of interest was enriched.**

# WASHINGTON STATE

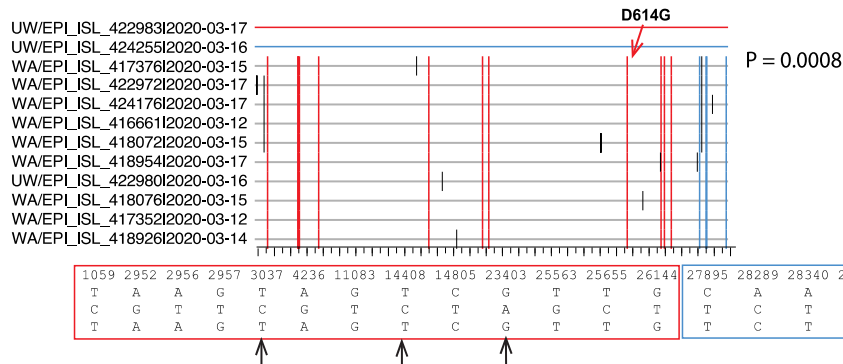

# NETHERLANDS

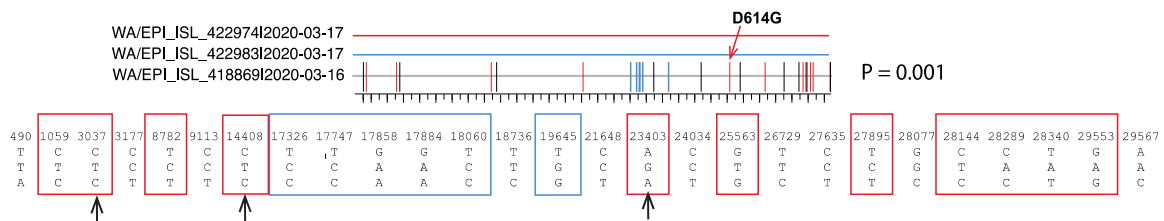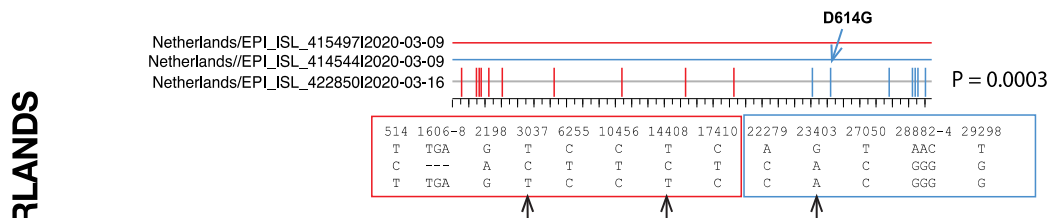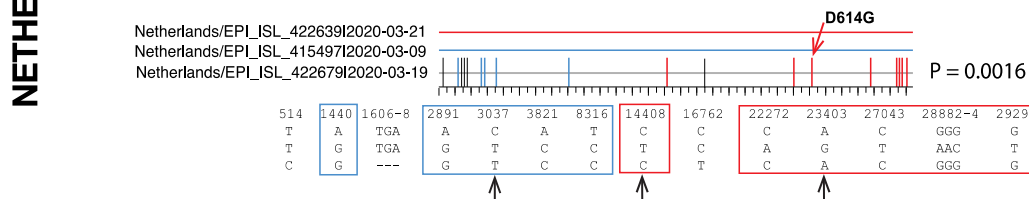

# BELGIUM

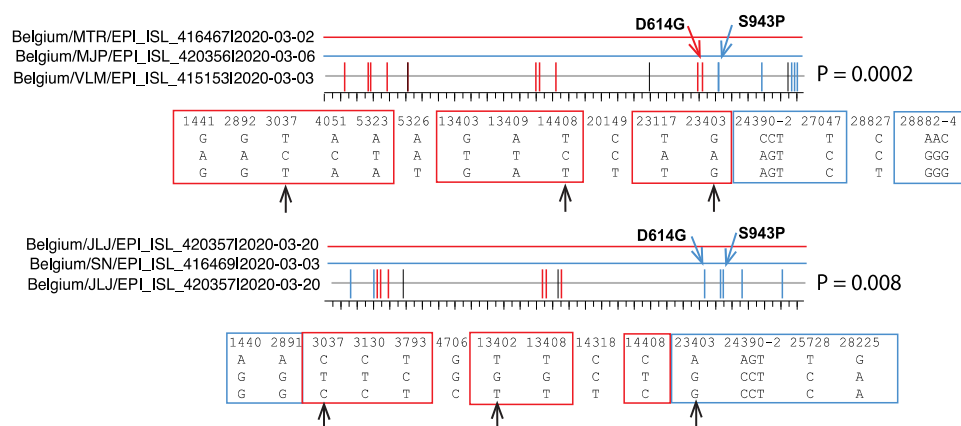

**Fig. S8 Recombination detected in three different regions.** Each graph represents a recombination event detected by the software RAPR. P-values are from the Wald–Wolfowitz runs test. While we are unlikely to have sampled actual recombination parents and child (the unique bases marked with black tics emphasize this), we have sampled representatives from each of the lineages that were likely to be involved in a recombination event. Putative parental strains are shown in red (top) and light blue (bottom) and the recombinant child is shown below with color-coded tic-marks representing mutations matching either parental strain. Nucleotides in black do not match either parent. Boxes below show nucleotides at each position of diversity

across the triplet, with red or light blue boxes highlighting the parental strain they match. Black arrows show the D614G trio of mutations at positions 3037, 14408 and 23403 (D614G in the spike gene). The p-values are based on a run-length statistic, and are not corrected for multiple tests. **Top panel:** A recombination event in which the putative recombinant “child” gave rise to a cluster of 10 recombinants in the WA state sequence set. Below, a second example from the same sequence set shows a more complex recombination event with two distinct breakpoints. **Middle panel:** Two examples of recombination events detected in the sequence set from the Netherlands. **Bottom panel:** Recombination events detected in the sequence set from Belgium showing both the D614G and S943P mutations in the spike gene.

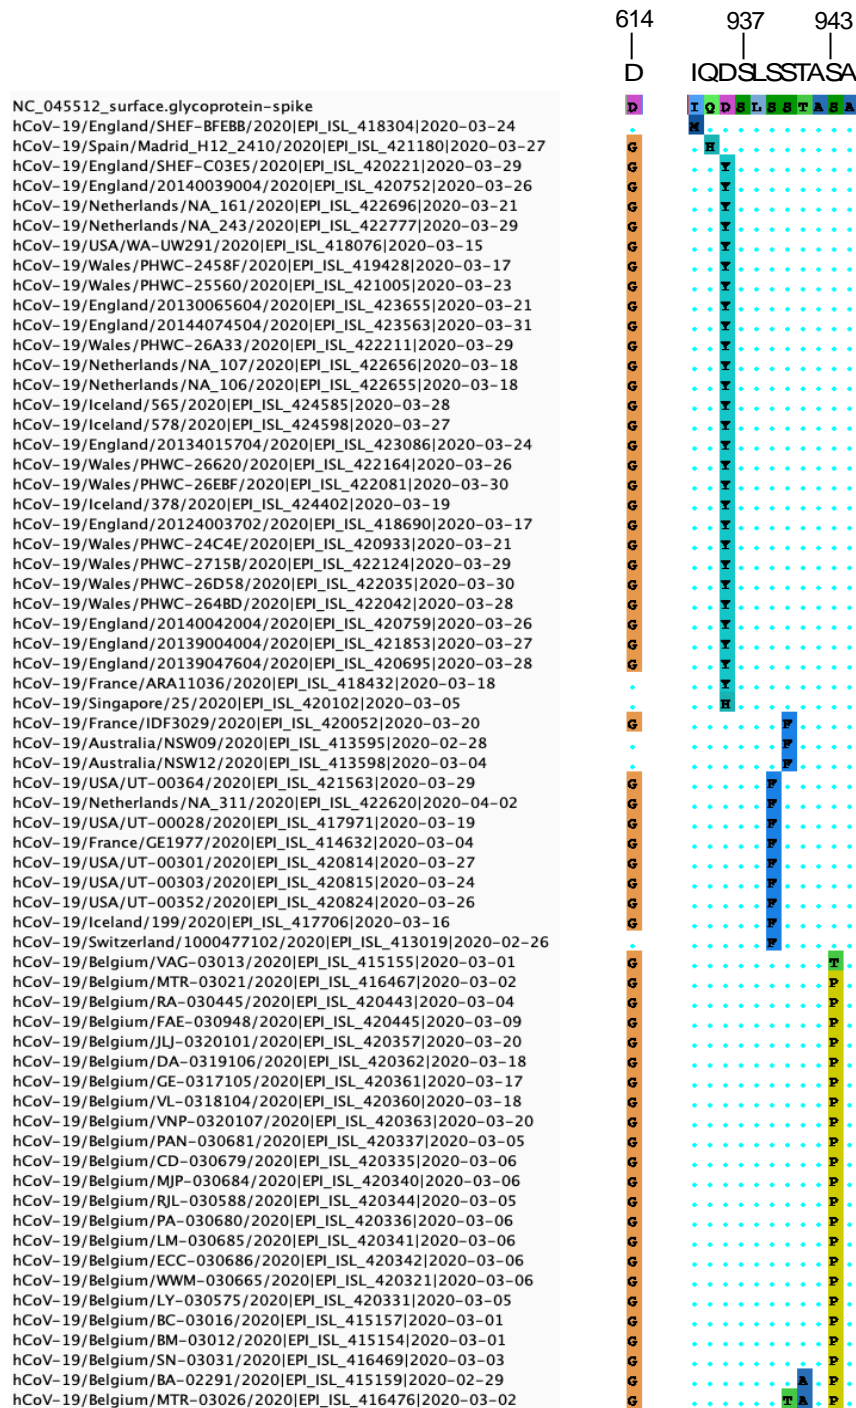

**Fig. S9.** This figure shows a cluster of mutations that give rise to the second highest entropy region when scanning the Spike protein, outside of the 10 mers that span the site at 614. It contains a Serine rich motif may be important for helical formation and fusion. The S943P/T mutation, which is also being tracked independently, and the D936Y mutation are beginning to be observed both within and outside of the major clade defined by the D614G mutation (shown to the left of the region of interest) and in many diverse regions geographic regions, suggesting de novo mutations or local recombination events. S943 is found only in Belgium, but other mutations in this immediate region are found in many places in the world. The fraction of sequences with mutations in the 934-943 region overall is holding steady over time at about 1% of the total sample (66/6346).
